# Supplementary material for: Imidazolidinium-based robust crypt with unique selectivity for fluoride anion
Source: Royal Society of Chemistry journal article supplement (doi:10.1039/b407434c), 2004-01-01
Supplement: b407434c.pdf [file b407434c.pdf]

## Experimental Section

All chemicals were of reagent grade quality obtained from commercial sources and used without further purification. The elemental analyses of C, H and N were performed on a Perkin-Elmer 240C elemental analyzer at the Analysis Center of Nanjing University. Electrospray mass spectra were carried out on a LCQ system (Finnigan MAT, USA) using methanol as mobile phase. 500 MHz  $^1\text{H}$  NMR spectroscopic measurements were performed on a Bruker AM-500 NMR spectrometer, using TMs ( $\text{SiMe}_4$ ) as an internal reference at 25 °C. The intensities of complexes **3** and **4** were collected on a Siemens SMART-CCD diffractometer with graphite-monochromatic Mo-K $\alpha$  radiation ( $\lambda = 0.71073 \text{ \AA}$ ) using SMART and SAINT program. The structure was solved by direct methods and refined on  $F^2$  with the full-matrix least-squares methods using SHELXTL version 5.1. The perchlorate and the tetrafluoroborate anions were refined disordered. Anisotropic thermal parameters were refined for non-hydrogen atoms. Hydrogen atoms of the host were located geometrically and refined in a riding model.

Preparation of compound **2**: In a stirring 5 mL dry xylene solution containing 0.18 g 1,4,7,10,13,16,21,24-octaazabicyclo[8,8,8] hexacosane at 120°C, 0.24 g triethyl orthoformate in 3 mL dry xylene were added dropwise. After refluxing for 3 hrs, 0.15 g  $\text{NH}_4\text{BF}_4$  was added. The reaction was carried out at 120°C for another 3 hrs, and then heated to 137°C, kept for 1 hr. White powder of crude product was obtained by cooling the solution to room temperature. Colorless crystalline solid **2** was obtained by recrystallization the original powder with water and dried under vacuum, yield 0.40 g, Anal. calcd.  $(\text{C}_{21}\text{H}_{39}\text{N}_8)(\text{NH}_4)(\text{BF}_4)_4 \cdot \text{H}_2\text{O}$ : C, 32.02, H, 5.72, N, 16.15; Found: C, 32.20, H, 5.46, N, 15.64. For compound **2** with the perchlorate anion: A solution of compound **2** in water was eluted through an anionic exchange column in the base form. The elutant was neutralized with a concentrated aqueous solution of  $\text{HClO}_4$ . The result solution was condensed by evaporator and placed over  $\text{P}_2\text{O}_5$ . Colorless crystal was obtained in high yield (near 100%) after several days. Anal. calcd.  $(\text{C}_{21}\text{H}_{39}\text{N}_8)(\text{ClO}_4)_3 \cdot \text{H}_2\text{O}$ : C, 35.02, H, 5.70, N, 15.57; Found: C, 34.98, H, 5.74, N, 15.40.

For the interior compound  $\text{F}^- \cdot 2\text{H}_2\text{O}$ : crystals of  $\text{F}^- \cdot 2\text{H}_2\text{O}$  suitable for X-ray structure analysis were formed by evaporating compound **2** in 0.1 M  $\text{HClO}_4$  and 0.1M  $\text{NaBF}_4$  solution. Anal. calcd.  $(\text{C}_{21}\text{H}_{39}\text{N}_8\text{F})(\text{BF}_4)_2(\text{ClO}_4)_2(\text{H}_2\text{O})_{0.5}$ : C, 31.42, H, 5.00, N, 14.00; Found: C, 31.32, H, 5.18, N, 13.64.

For a high affinity host, the concentration of the fluoride anion [F<sup>-</sup>] is quite small; since the [Zr<sup>4+</sup>] is constant (0.5M) which is larger than [F<sup>-</sup>], only the comproportion of the ZrF is considered. In this case, the competition reactions quoted are as bellow:

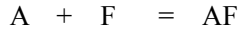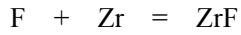

$$[AF] / ([A] [F]) = K_s$$

$$[ZrF] / ([F] [Zr]) = \beta$$

$$[F] = [ZrF] / (\beta [Zr]) = 2 [ZrF] / \beta$$

$$K_s = [AF] * \beta / ([A] * 2[ZrF])$$

$$2K_s/\beta = [AF] / ([A] [ZrF])$$

Where [A] is the concentration of the free crypt, [AF] is the concentration of the interior compound, [ZrF] is the concentration of the competition product.

Assume the beginning concentration of [A] is  $c_0$ , [AF] =  $xc_0$ , then [A] =  $(1-x)c_0$ .

Assume the chemical shift before added the fluoride anion is  $\delta_0$ , and the  $\delta_L$  is the chemical shift of the pure interior compound. And  $\delta$  is the chemical shift at the time the concentration of the added fluoride anion of  $ac_0$ ,

Assume [AF] =  $xc_0$ , then [A] =  $(1-x)c_0$  then:

$$x = (\delta_L - \delta) / (\delta_L - \delta_0)$$

$$1 - x = (\delta - \delta_0) / (\delta_L - \delta_0)$$

$$[ZrF] = c_0 (a - x) = c_0 [a - (\delta_L - \delta) / (\delta_L - \delta_0)]$$

$$2K_s c_0/\beta = [AF] / ([A] [ZrF]) = (\delta_L - \delta) / \{(\delta - \delta_0) * c_0 [a - (\delta_L - \delta) / (\delta_L - \delta_0)]\}$$

$$2K_s c_0/\beta [a - (\delta_L - \delta) / (\delta_L - \delta_0)] = (\delta_L - \delta) / (\delta - \delta_0)$$

$$2K_s c_0/\beta [a / (\delta_L - \delta) - 1 / (\delta_L - \delta_0)] = 1 / (\delta - \delta_0)$$

$$a / (\delta_L - \delta) - 1 / (\delta_L - \delta_0) = (\beta/2K_s c_0) / (\delta - \delta_0)$$

Draw the plot  $[a / (\delta_L - \delta)]$  vs  $[1 / (\delta - \delta_0)]$ , the  $K_s$  value could be obtained ( $\log\beta = 8.8$  for our calculation).

**Table 1.** Interaction energy and electron density topological properties for the complex **3**.

| Interactions          |                                        | $10^2\rho(r)$ | $10^2\nabla^2\rho(r)$ |
|-----------------------|----------------------------------------|---------------|-----------------------|
| CP(3,-1)              | H(1A)-F(1)                             | 4.468         | 15.518                |
|                       | H(4A)-F(1)                             | 4.404         | 15.285                |
|                       | F(1)-C(3)                              | 1.800         | 6.198                 |
|                       | F(1)-C(10)                             | 1.821         | 6.260                 |
|                       | F(1)-C(17)                             | 1.934         | 6.770                 |
| CP(3,1)               | F(1)-C(17)-N(7)-C(16)-C(15)-N(1)-H(1A) | 0.549         | 2.589                 |
|                       | F(1)-C(17)-N(8)-C(20)-C(21)-N(4)-H(4A) | 0.566         | 2.700                 |
|                       | F(1)-C(3)-N(2)-C(2)-C(1)-N(1)-H(1A)    | 0.597         | 2.738                 |
|                       | F(1)-C(3)-N(3)-C(6)-C(7)-N(4)-H(4A)    | 0.594         | 2.834                 |
|                       | F(1)-C(10)-N(5)-C(9)-C(8)-N(1)-H(1A)   | 0.578         | 2.721                 |
|                       | F(1)-C(10)-N(6)-C(13)-C(14)-N(4)-H(4A) | 0.627         | 2.867                 |
| $\Delta E$ (Kcal/Mol) |                                        | -505.83       |                       |
